# Supplementary material for: Low mitochondrial DNA copy number induces chemotherapy resistance via epithelial-mesenchymal transition by DNA methylation in esophageal squamous cancer cells
Source: Springer Nature journal article supplement (doi:10.1186/s12967-022-03594-2), 2022-08-29
Supplement: MOESM1 [file 23428950]

# Supplemental Figure. 1

## A

### TE8

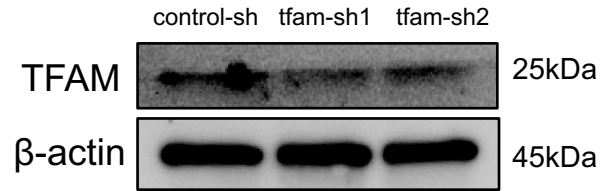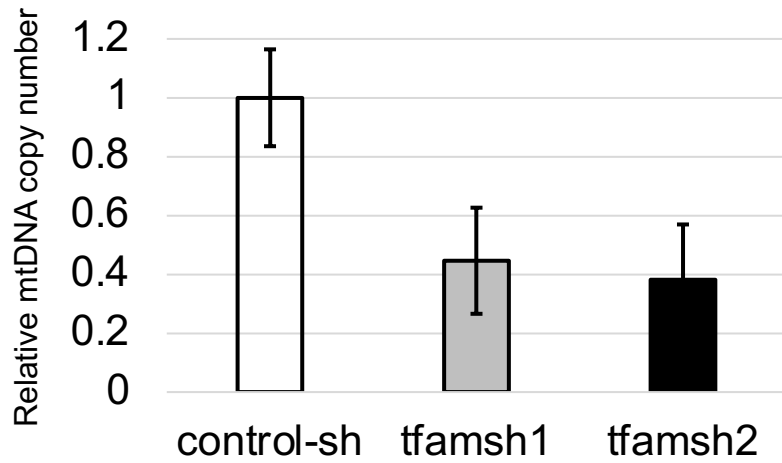

## B

### TE11

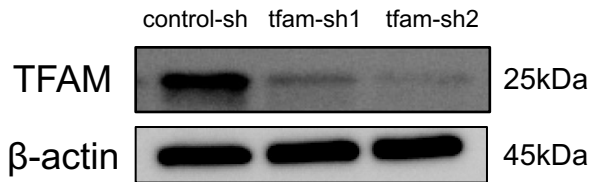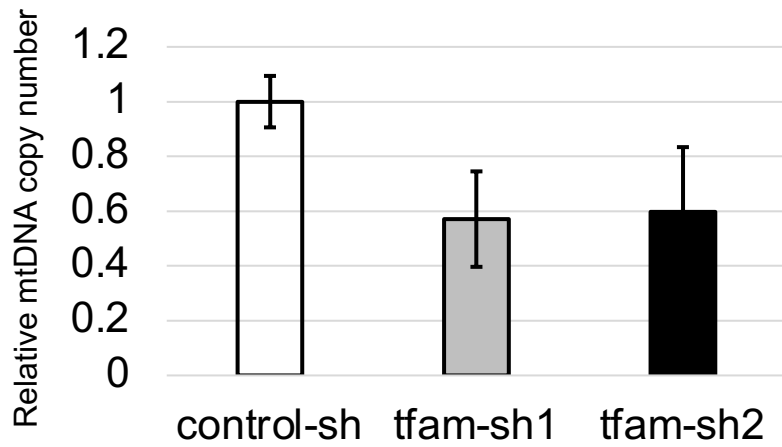

## C

### TE8

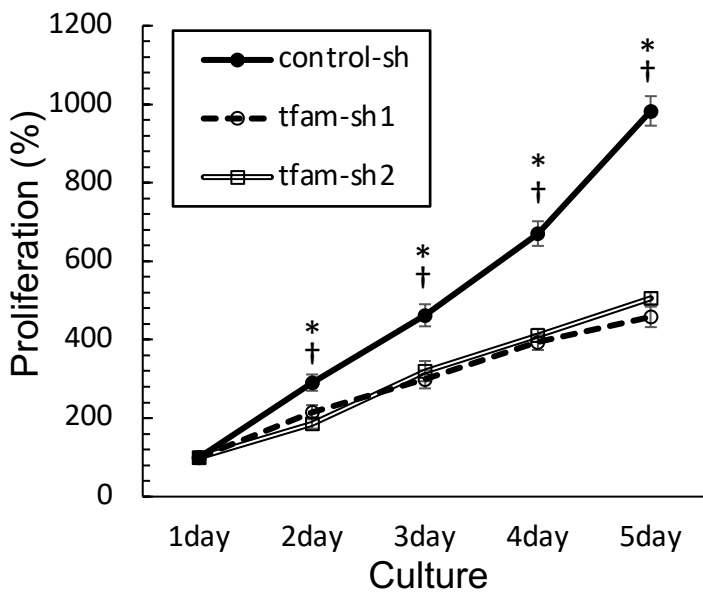

### TE11

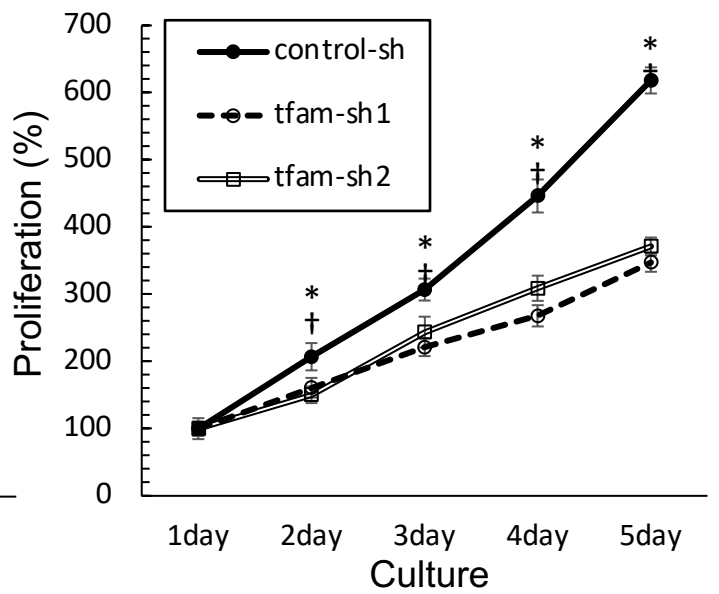

\* p<0.05 control-sh vs tfam-sh1  
 † p<0.05 control-sh vs tfam-sh2
