# Supplementary material for: Low mitochondrial DNA copy number induces chemotherapy resistance via epithelial-mesenchymal transition by DNA methylation in esophageal squamous cancer cells
Source: Springer Nature journal article supplement (doi:10.1186/s12967-022-03594-2), 2022-08-29

# Supplemental Figure. 2

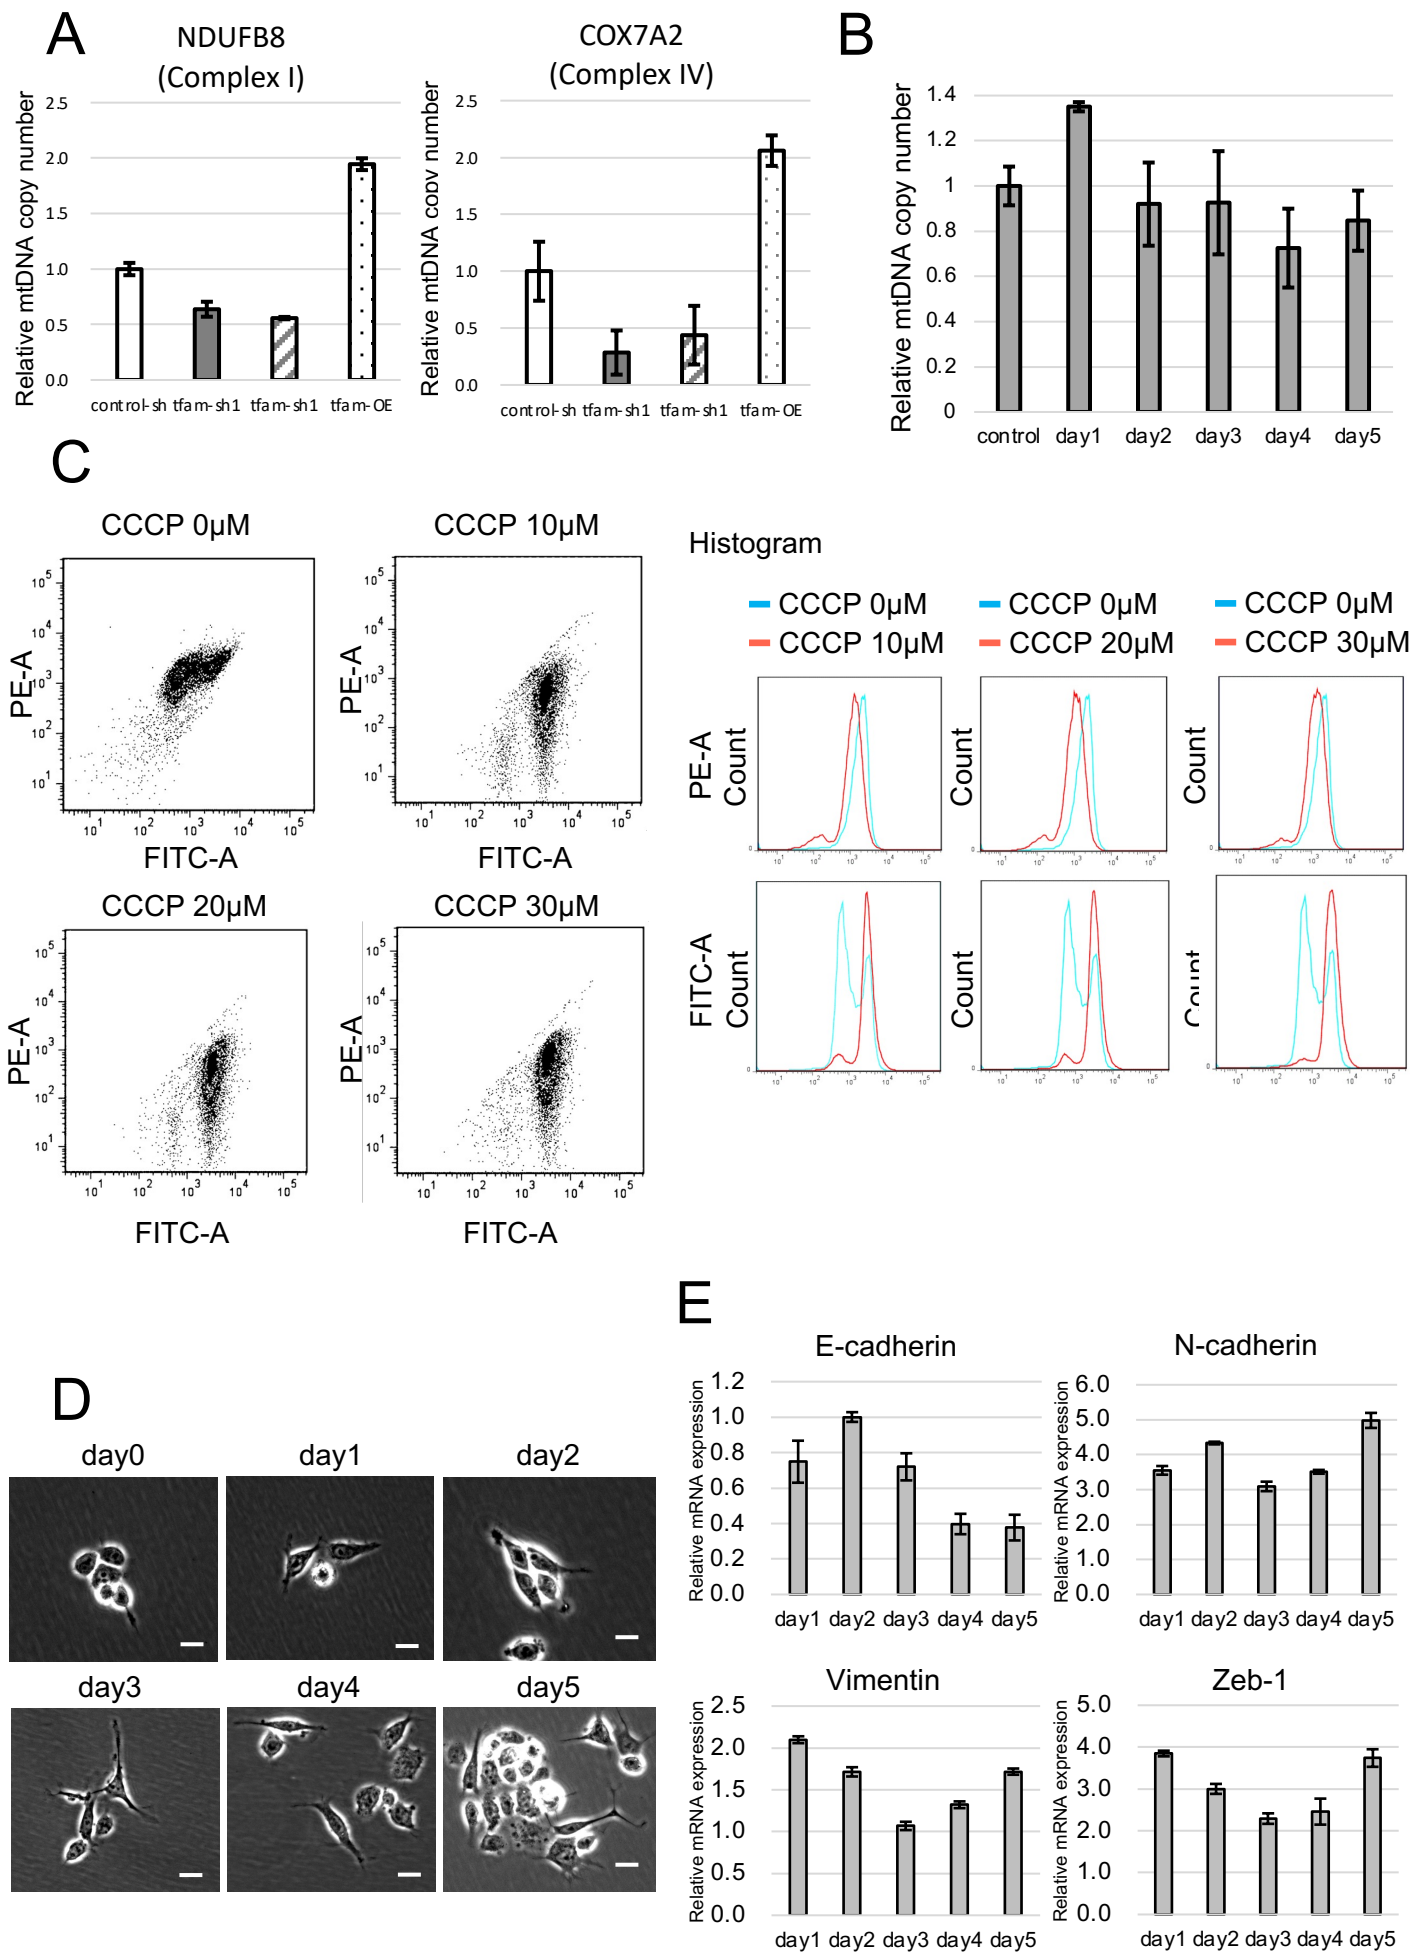

Supplement: MOESM2 [file 23428950]
